# Supplementary material
Source: PubMed Central journal article supplement (PMC9453611)
Supplement: mmc1.pdf [file mmc1.pdf]

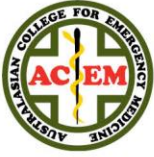

# Australasian College for Emergency Medicine

34 Jeffcott Street West Melbourne Victoria 3003, Australia  
+61 3 9320 0444 | admin@acem.org.au | ABN 76 009 090 715

Dear Global Emergency Care Colleagues and Partners

## ACEM COVID-19 Online GEC Monthly Support Forums - 19 January to 20 April 2021

The ACEM Global Emergency Care Committee (GECCo) is holding the ACEM COVID-19 Online GEC Support Forums for **all Emergency Care workers** working in resource-limited systems in low and middle-income countries, who are managing the impact of the COVID-19 pandemic. These Forums will be held monthly from 19 January to 20 April 2021 at 1pm.

The Support Forums are hosted by an experienced multi-disciplinary team including ACEM GEC and nursing faculty members. They will offer direct peer-support plus opportunities to workshop issues raised, to investigate the possibility of future collaboration and the development of support resources to address any outstanding needs.

The key themes to be addressed at each Forum are: Clinical Care, Systems and Space, Supplies and Staff

### Details of the upcoming ACEM COVID-19 Online GEC Support Forums:

| Support Forum | Date                   | Time              |
|---------------|------------------------|-------------------|
| 15            | Tuesday 19 January 21  | 1pm-2.30pm (AEST) |
| 16            | Tuesday 23 February 21 | 1pm-2.30pm (AEDT) |
| 17            | Tuesday 23 March 21    | 1pm-2.30pm (AEDT) |
| 18            | Tuesday 20 April 21    | 1pm-2.30pm (AEST) |

**ACEM GEC Online Team:** Megan Cox (facilitator), Colin Banks, Georgina Phillips, Gerard O'Reilly, Anne Creaton, Rob Mitchell

**Guest Nursing Faculty:** Mamatuki Sosefo, Angie Gittus, Bronwen Griffiths, Sarah Bornstein, Leigh Elton

**Join via Zoom Meeting:**

*Join via your PC:* <https://acem.zoom.us/j/4289796977>

*Dial in by your location:* Meeting ID: 428 979 6977

If you are unable to join any of the GEC Support Forums but wish to still be involved or have any topics of interest that you would like future GEC Support Forums to address, please contact the ACEM GEC Desk on [gecnetwork@acem.org.au](mailto:gecnetwork@acem.org.au). The Summaries and resources from the previous Support Forums are available via the ACEM GEC Desk as well as the ACEM website: <https://acem.org.au/Content-Sources/Advancing-Emergency-Medicine/COVID-19/Resources/ACEM-Resources>.

Kind regards,

*Dr Colin Banks, Chair, ACEM Global Emergency Care Committee*
